# Supplementary material
Source: bioRxiv or medRxiv preprint supplement (https://www.medrxiv.org/highwire/filestream/80680/field_highwire_adjunct_files/0/2020.05.09.20096586-1.pdf)

## Supplementary files

### Model-based Cellular Kinetic Analysis of Chimeric Antigen Receptor-T Cells in Humans

Can Liu, Vivaswath S. Ayyar, Xirong Zheng, Wenbo Chen, Songmao Zheng, Hardik Mody, Weirong Wang, Donald Heald, Aman P. Singh\*, Yanguang Cao\*

**Table S1.** Estimates of model parameters

**Figure S1-S6.** Model fitting and validation plots in the trial of ALL (Pediatric), ALL (Adult), MM, CLL, NSCLC and GBM.

**Figure S7.** Individual model-estimated parameters in the distribution phase of DLBCL.

**Figure S8.** Individual model-estimated persistence duration ( $T_2$ ) and contraction duration ( $T_2-T_1$ ).

**Figure S9.** The correlation between dose and model parameters.

**Figure S10.** The correlation between pre-treatment tumor burden and model parameters.

**Figure S11.** The correlation between CD4:CD8 ratio and model parameters.

**Figure S12.** The correlation between patient age and model parameters.

**Figure S13.** The effect of lymphodepletion on model parameters.

**Figure S14.** The effect of lymphodepletion regimen on model parameters.

**Figure S15.** The correlations among model parameters.

**Figure S16.** The simulated profiles of 1000 virtual patients for each trial.

**Figure S17.** The simulated profiles for responders and non-responders

**Table S1.** Estimates of model parameters

| Indication      | $C_{\max}$<br>(Median,<br>copies / $\mu\text{g}$<br>DNA) | $\beta$<br>( $\text{mon}^{-1}$ ) | $\alpha$<br>( $\text{mon}^{-1}$ ) | $r_M$<br>( $\text{mon}^{-1}$ ) | $\delta_M$<br>( $\text{mon}^{-1}$ ) | $\beta$<br>RSE% | $\beta$<br>IIV | $\alpha$<br>RSE% | $\alpha$<br>IIV | $r_M$<br>RSE% | $r_M$<br>IIV | $\delta_M$<br>RSE<br>% | $\delta_M$<br>IIV |
|-----------------|----------------------------------------------------------|----------------------------------|-----------------------------------|--------------------------------|-------------------------------------|-----------------|----------------|------------------|-----------------|---------------|--------------|------------------------|-------------------|
| ALL (Pediatric) | 52,198                                                   | 15.9                             | 3.91                              | 0.046                          | 0.113                               | 12.2            | 0.533          | 17.7             | 0.266           | 60.4          | 1.50         | 120                    | 0.233             |
| ALL (Adult)     | 9,070                                                    | 20.5                             | 2.32                              | 0.001                          | 0.022                               | 6.76            | 0.376          | 24.9             | 0.68            | 91.9          | 1.35         | 153                    | 2.18              |
| CLL             | 4,300                                                    | 7.03                             | 1.72                              | 0.032                          | 0.004                               | 33.3            | 1.06           | 54.9             | 0.748           | 79.4          | 0.40         | 237                    | 2.81              |
| MM              | 20,606                                                   | 13.9                             | 3.78                              | 0.061                          | 0.087                               | 8.48            | 0.389          | 22.0             | 0.791           | 46.5          | 1.64         | 50.1                   | 1.35              |
| DLBCL           | 5,666                                                    | 11.8                             | 5.91                              | 0.82                           | 0.0502                              | 6.4             | 0.562          | 12               | 0.706           | 25.2          | 0.938        | 83                     | 1.54              |
| NSCLC           | 4,818                                                    | 38.4                             | 3.49                              | 0.263                          | 0.0002                              | 8.91            | 0.289          | 68               | 0.802           | 126           | 2.44         | 293                    | 2.1               |
| GBM             | 2,034                                                    | 6.98                             | 7.83                              | 0.454                          | 0.002                               | 16.4            | 0.457          | 17               | 0.259           | 28.5          | 0.529        | 483                    | 2.46              |

$\alpha$ , contraction rate constant;  $\beta$ , proliferation rate constant;  $C_{\max}$ , maximal CAR-T concentration;  $\delta_M$ , memory death rate constant; IIV, inter-individual variability;  $r_M$ , memory differentiation rate constant. RSE, relative standard error.

**Figure S1.** Model fitting and validation plots in the trial of ALL (Pediatric). (A) Individual fitting plots of representative patients; (B) The goodness-of-fit plot (C) visual predictive check (VPC) plot.

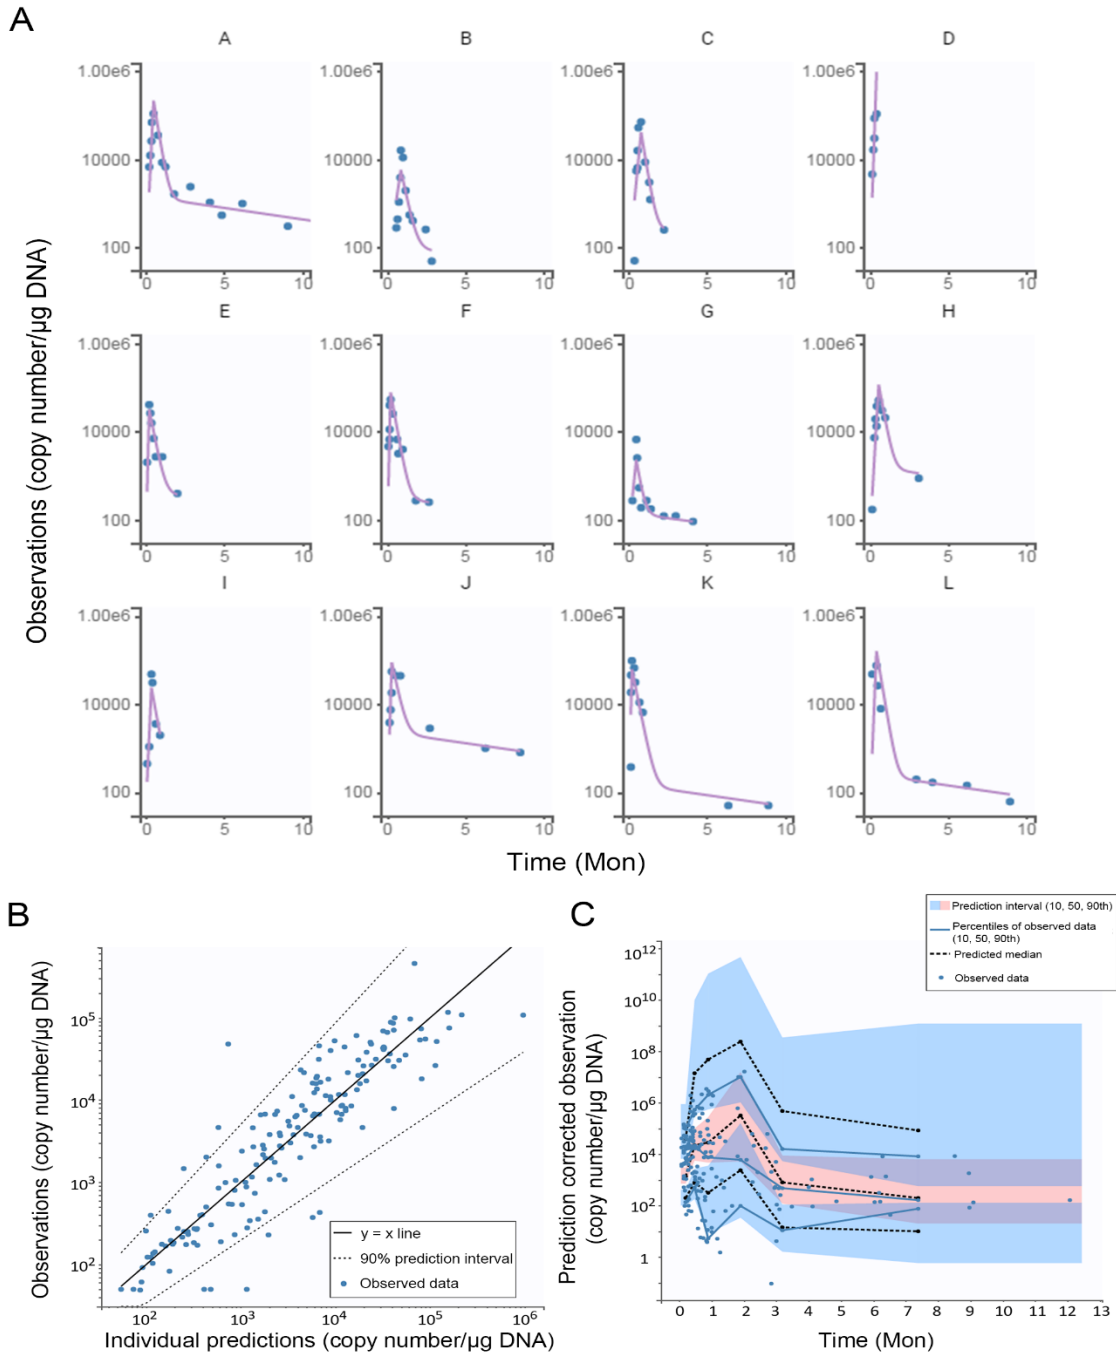

**Figure S2.** Model fitting and validation plots in the trial of ALL (Adult). (A) Individual fitting plots of representative patients; (B) The goodness-of-fit plot (C) visual predictive check (VPC) plot.

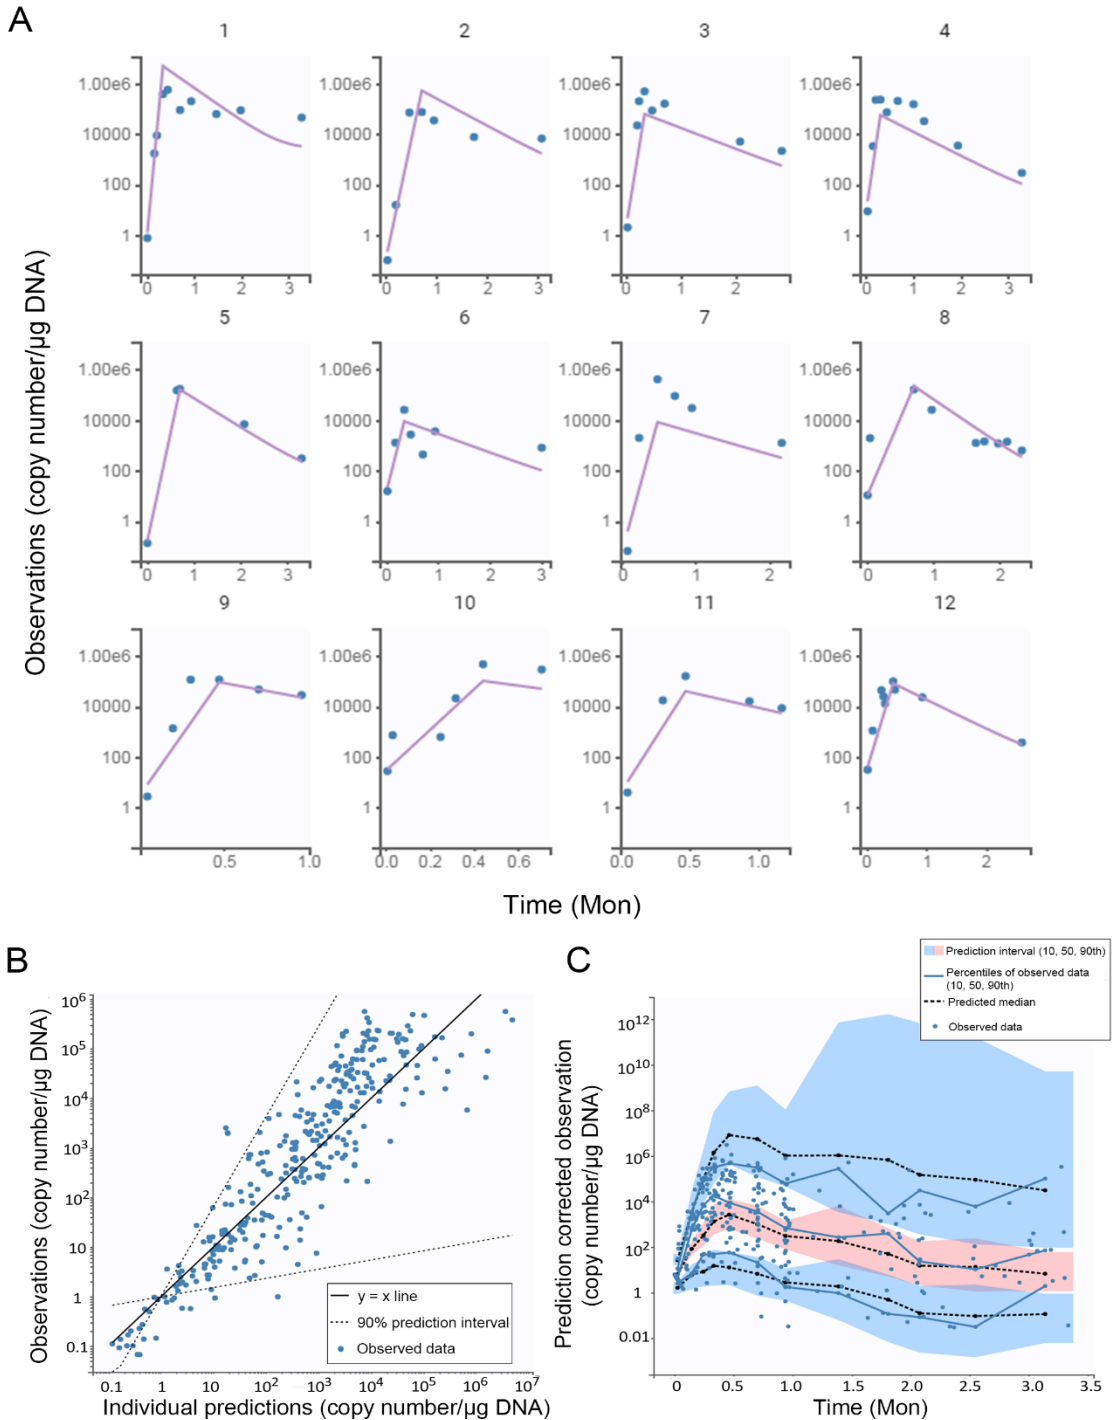

**Figure S3.** Model fitting and validation plots in the trial of MM. (A) Individual fitting plots of representative patients; (B) The goodness-of-fit plot (C) visual predictive check (VPC) plot.

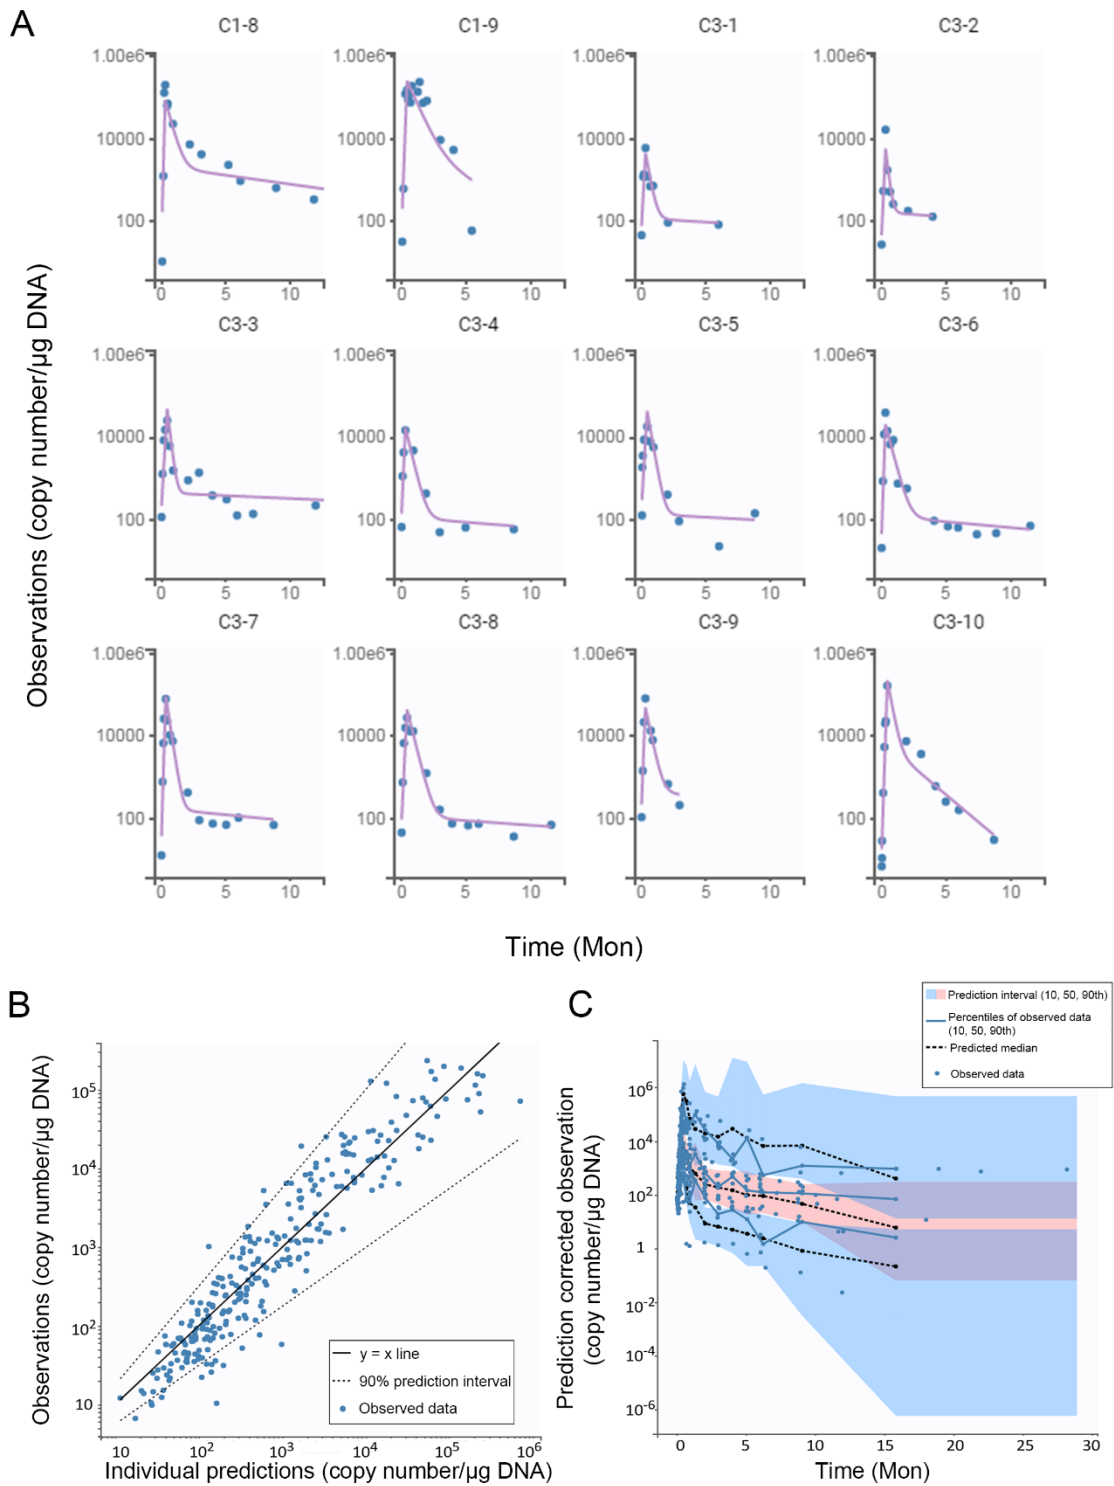

**Figure S4.** Model fitting and validation plots in the trial of CLL. (A) Individual fitting plots of representative patients; (B) The goodness-of-fit plot (C) visual predictive check (VPC) plot.

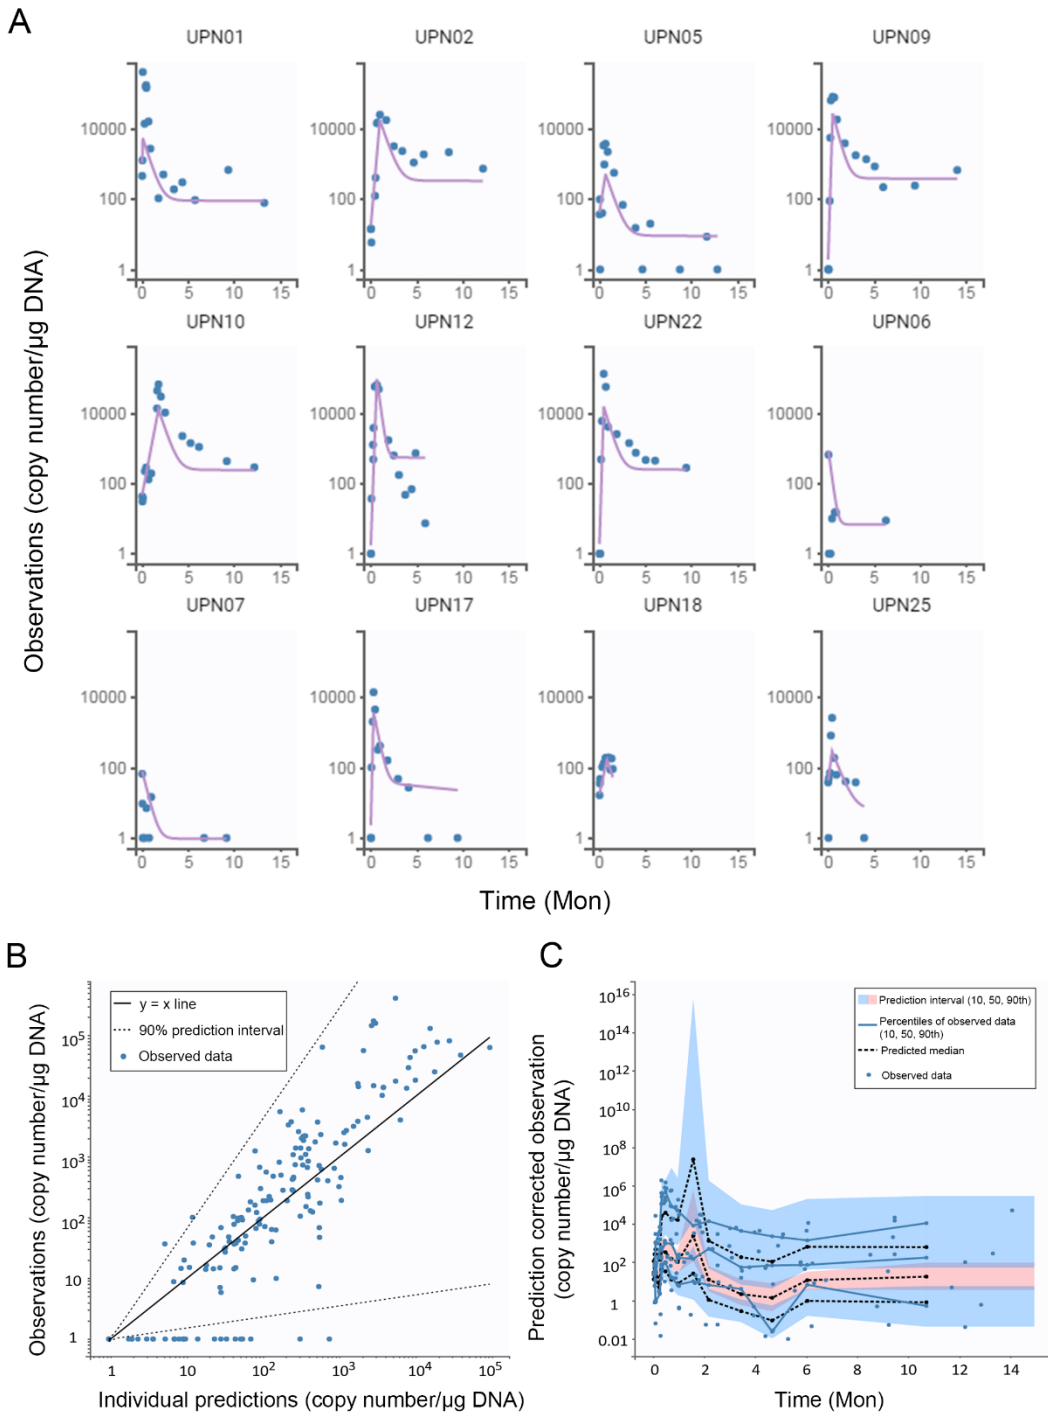

**Figure S5.** Model fitting and validation plots in the trial of NSCLC. (A) Individual fitting plots of representative patients; (B) The goodness-of-fit plot (C) visual predictive check (VPC) plot.

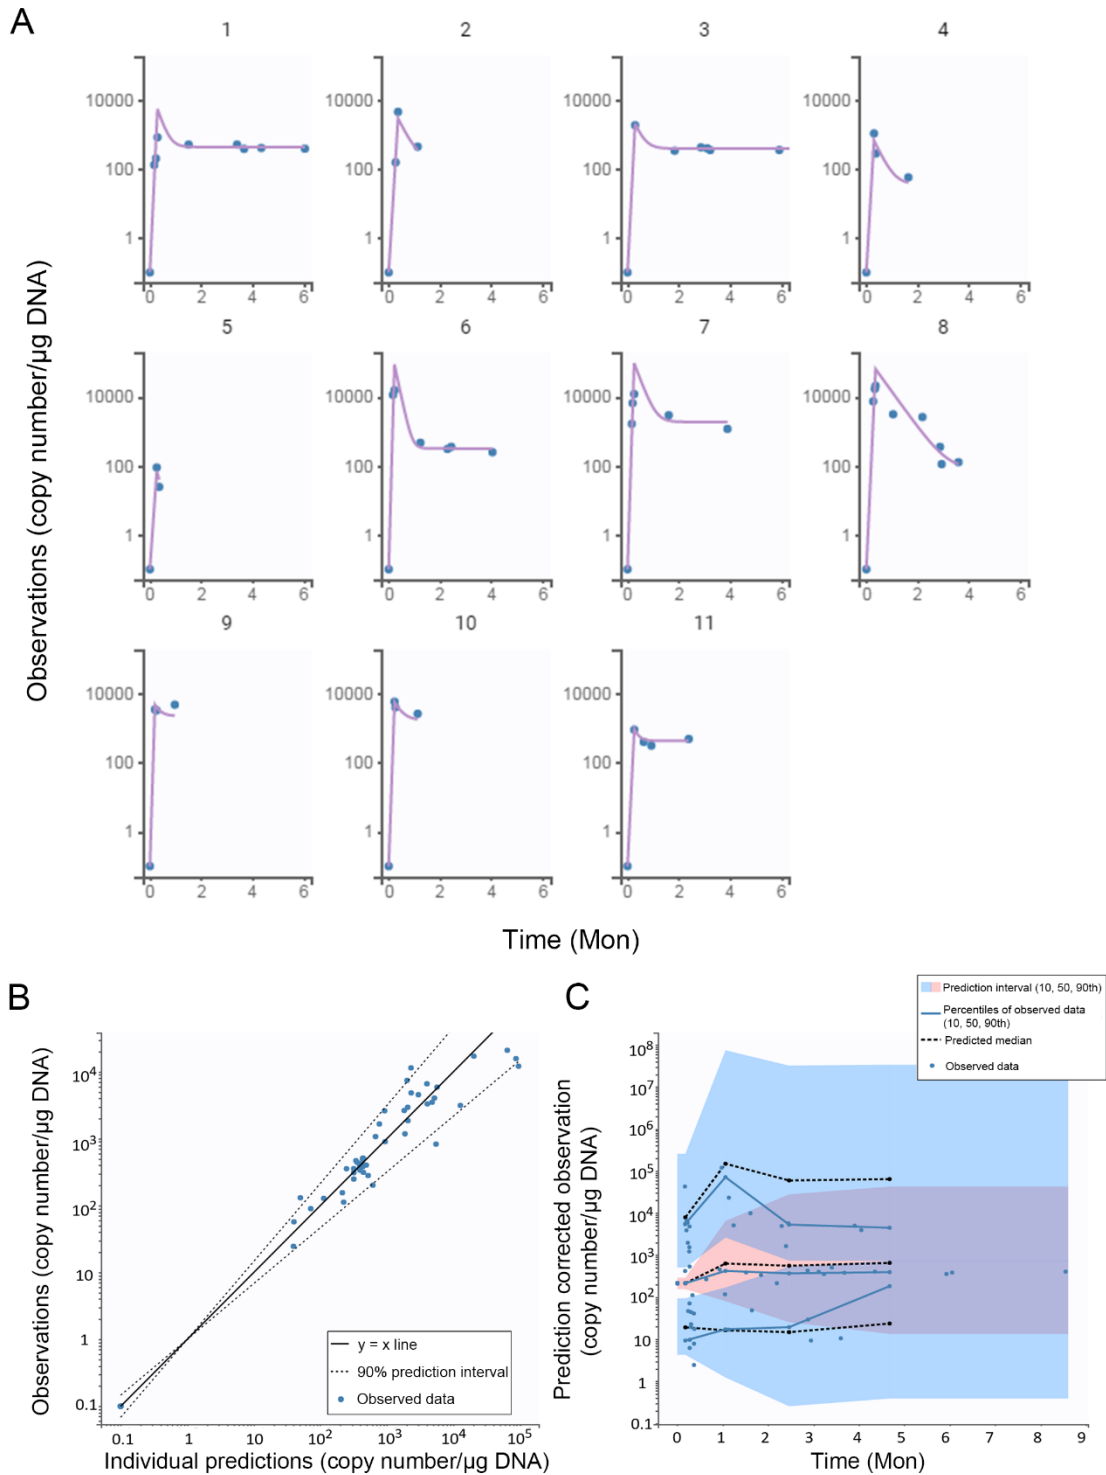

**Figure S6.** Model fitting and validation plots in the trial of GBM. (A) Individual fitting plots of representative patients; (B) The goodness-of-fit plot (C) visual predictive check (VPC) plot.

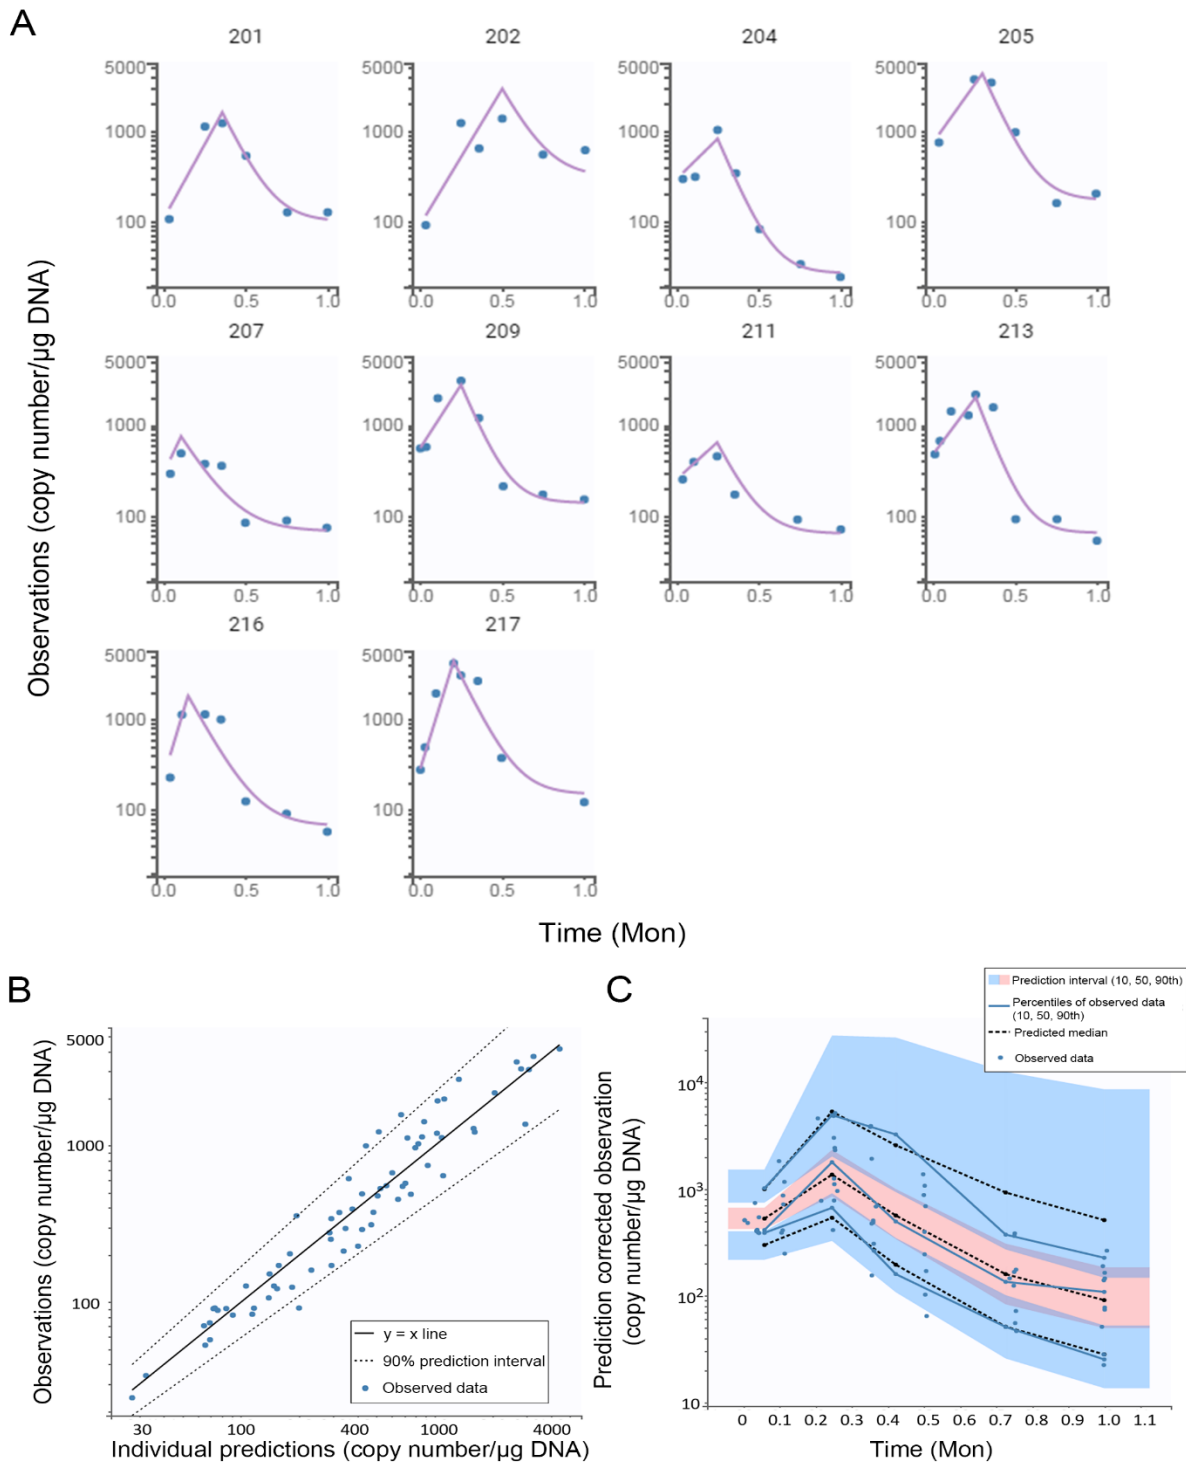



**Figure S7.** Individual model-estimated parameters for responders (CR/PR) and non-responders (PD/NR) in the distribution phase of DLBCL. (A) Distribution rate constant ( $k$ ); (B) Distribution duration ( $T_0$ ). Data distribution was described by boxplot (minimum, first quartile, median, third quartile, and maximum).  $p < 0.05$  (Wilcoxon test) is considered as significant difference.

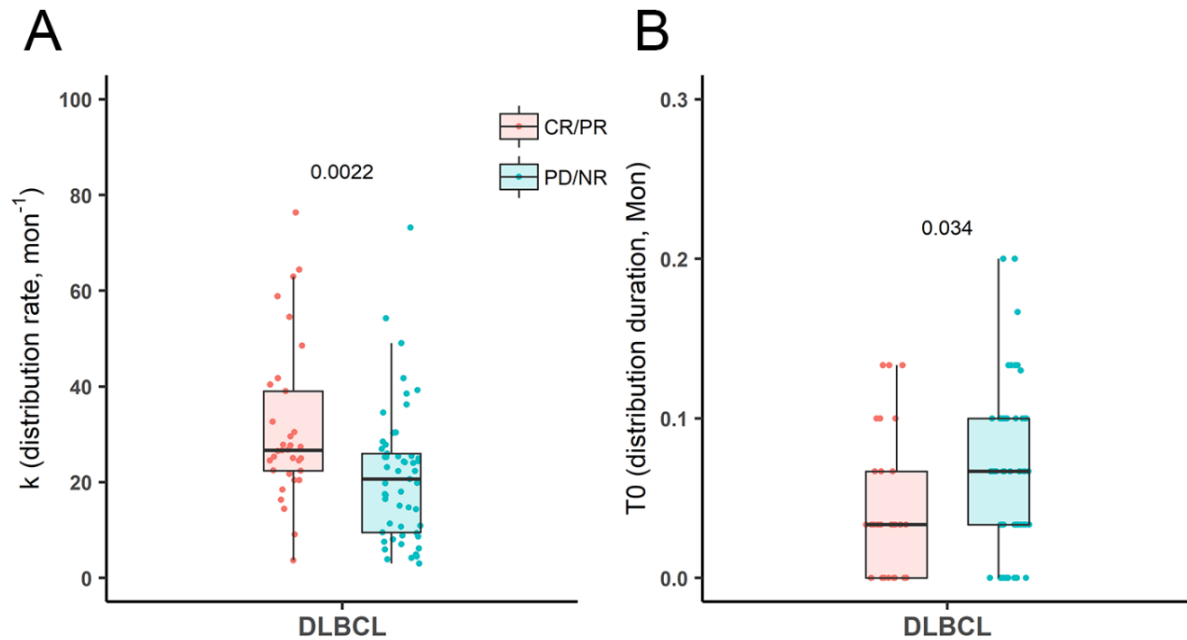

**Figure S8.** Individual model-estimated parameters for responders (CR/PR) and non-responders (PD/NR). Data from responders and non-responders are shown separately and compared for each trial. (A) Persistence duration ( $T_2$ ); (B) Contraction duration ( $T_2 - T_1$ ). Data distribution was described by boxplot (minimum, first quartile, median, third quartile, and maximum).  $p < 0.05$  (Wilcoxon test) is considered as significant difference.

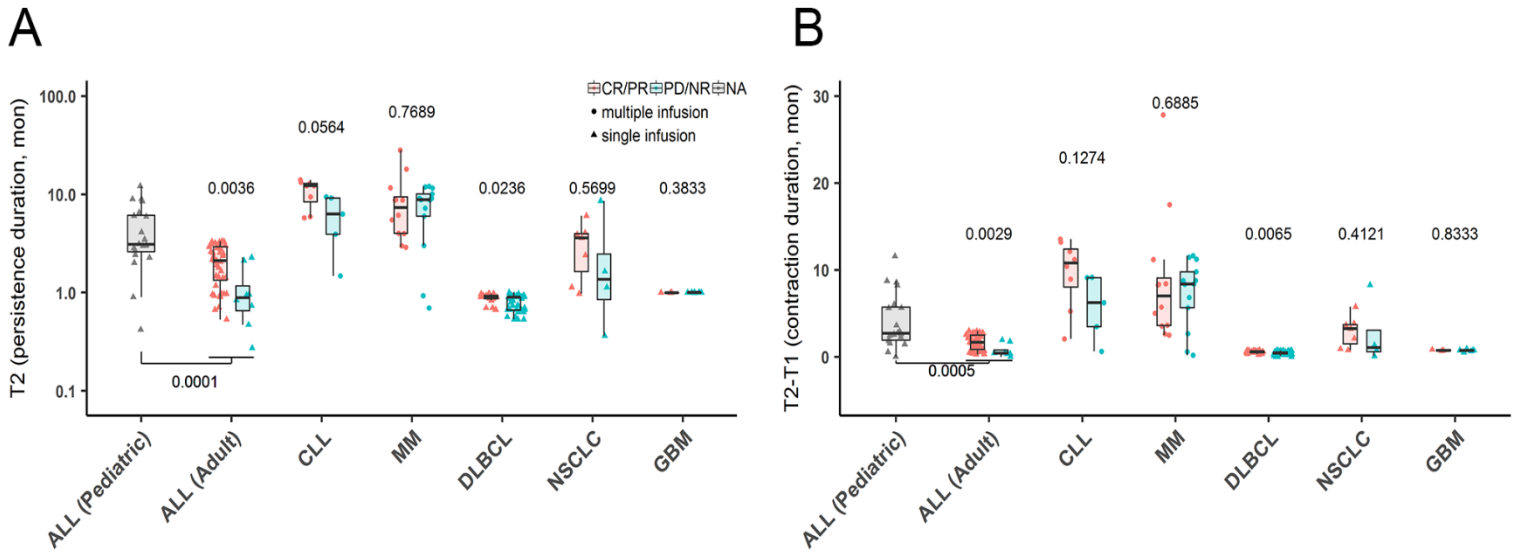

**Figure S9.** The correlation between dose and model parameters in the trial of MM, CLL, NSCLC and GBM.  $p < 0.05$  (Spearman's correlation) is considered as significant.

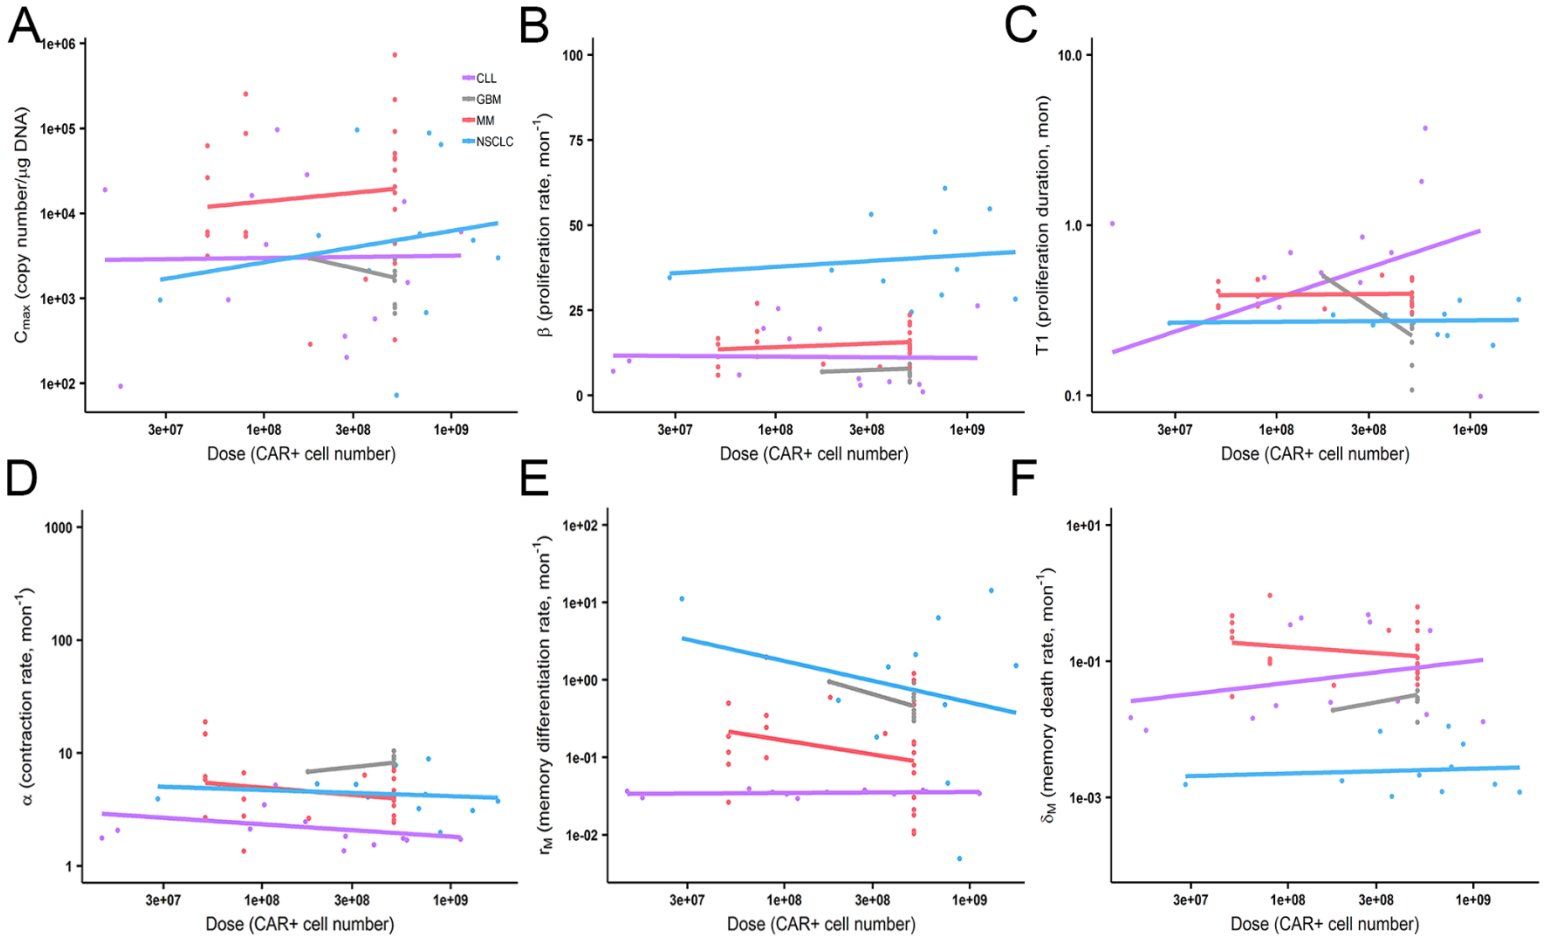

**Figure S10.** The correlation between pre-treatment tumor burden and model parameters in the trial of MM (A) and CLL (B).  $p < 0.05$  (Spearman's correlation) is considered as significant.

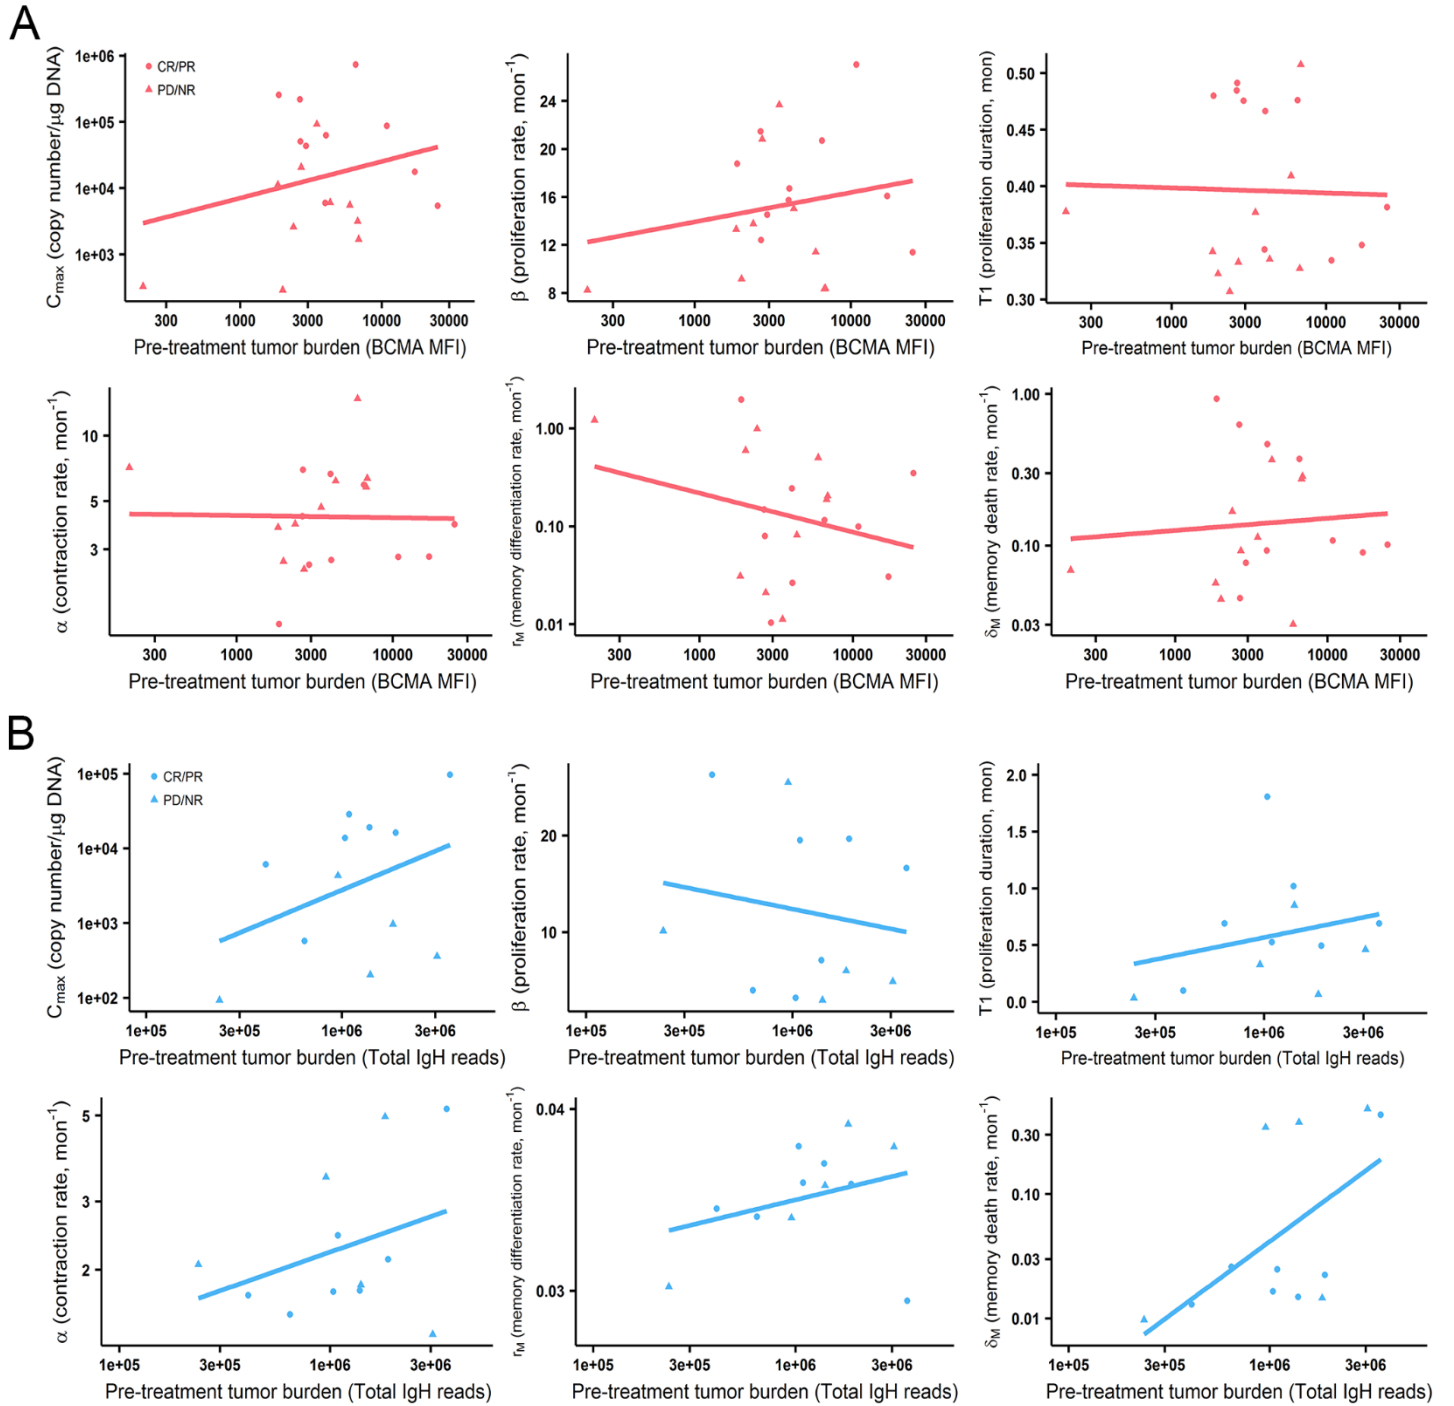

**Figure S11.** The correlation between CD4:CD8 ratio and model parameters in the trial of MM and NSCLC.  $p < 0.05$  (Spearman's correlation) is considered as significant.

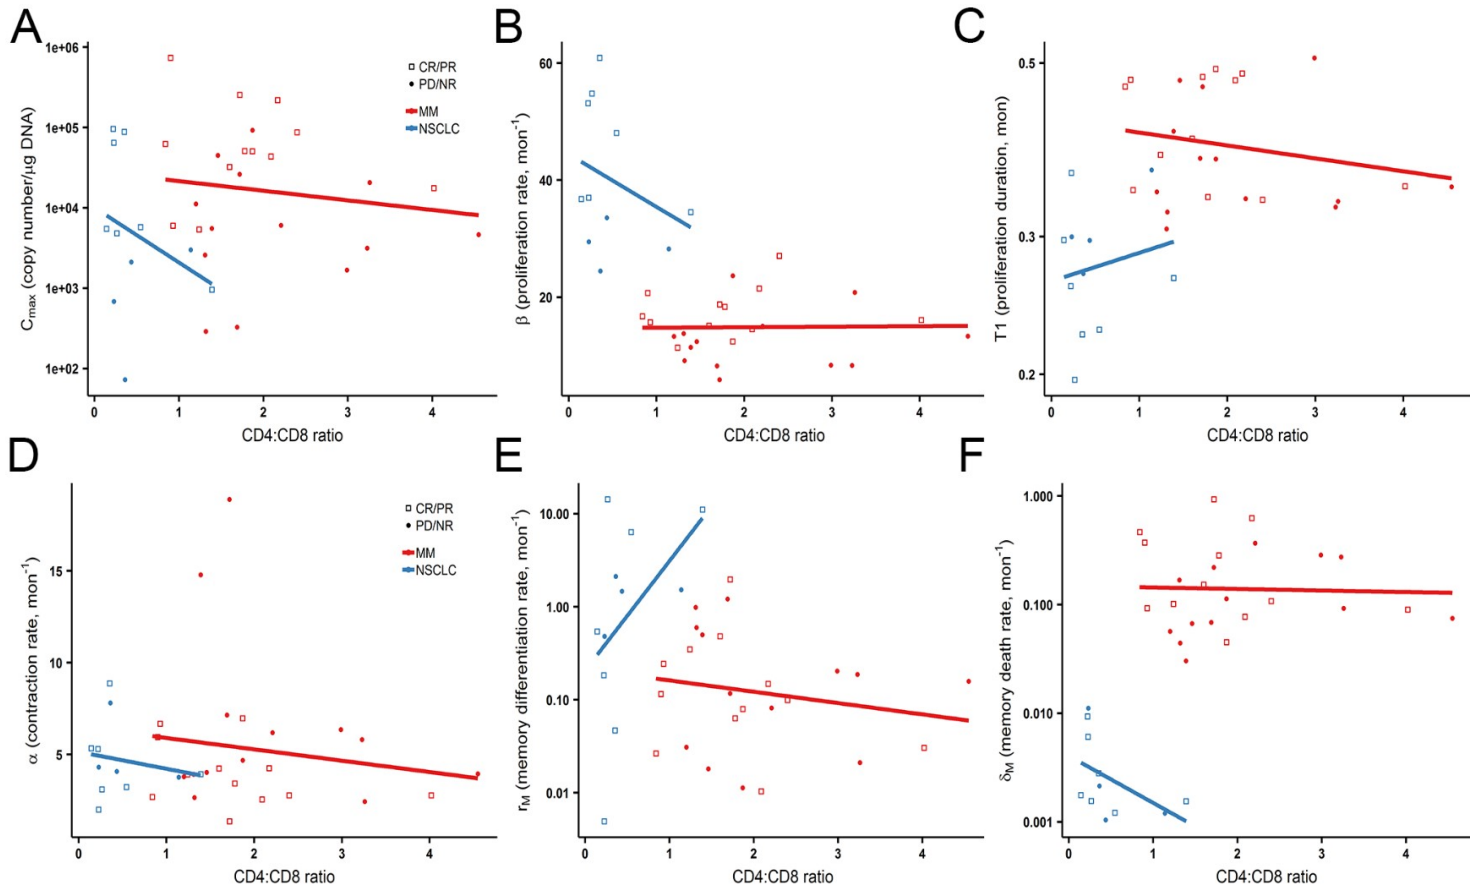

**Figure S12.** The correlation between patient age and model parameters in the trial of MM, GBM and NSCLC.  $p < 0.05$  (Spearman's correlation) is considered as significant.

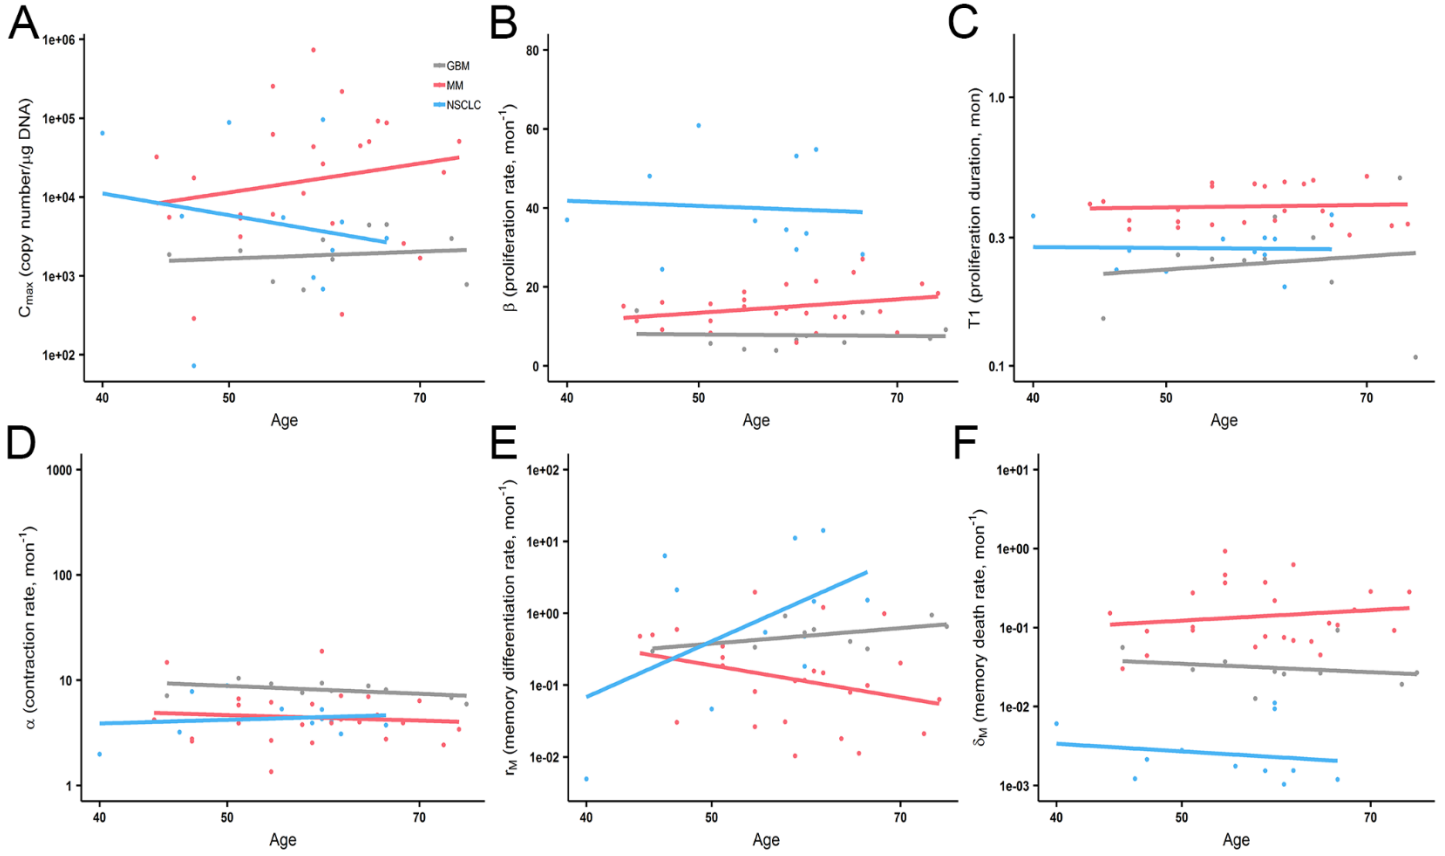

**Figure S13.** The effect of lymphodepletion on model parameters in the trial of MM and NSCLC. “Yes” indicates patients received lymphodepletion prior to CAR-T infusion; “No” means no patient received lymphodepletion. Data distribution was described by boxplot (minimum, first quartile, median, third quartile, and maximum).  $p < 0.05$  (Wilcoxon test) is considered as significant difference.

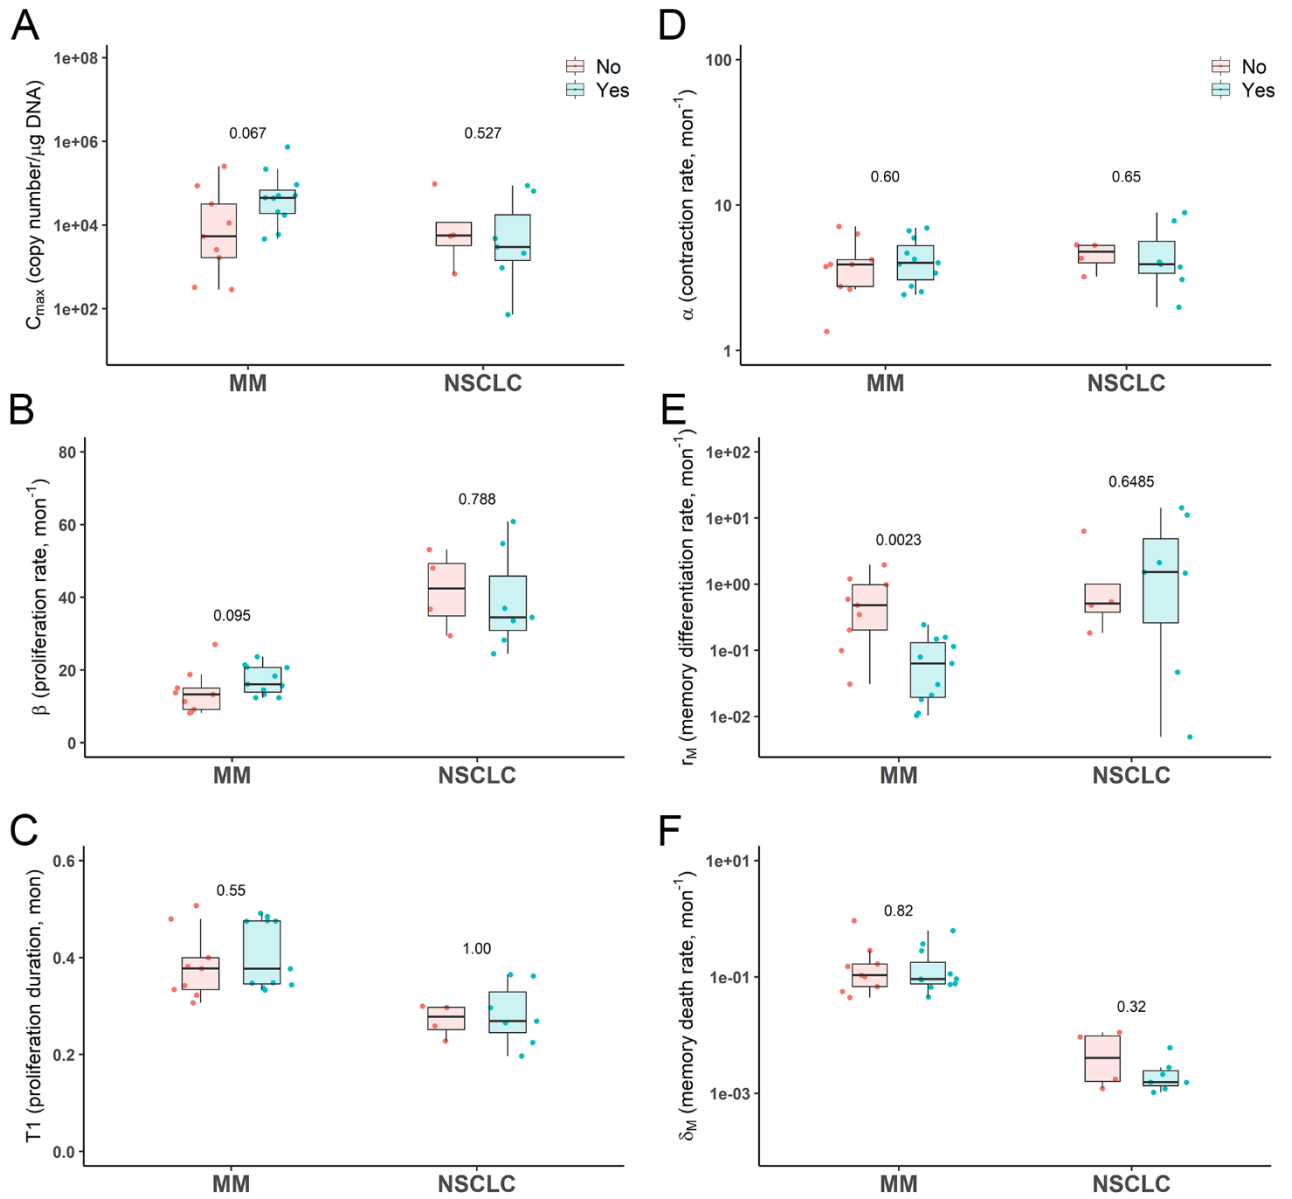

**Figure S14.** The effect of lymphodepletion regimen on model parameters in the trial of ALL (Adult). “Flu” is short for fludarabine, which indicates patients received cyclophosphamide-based lymphodepletion with fludarabine. “No Flu” indicates patients received cyclophosphamide-based lymphodepletion without fludarabine. Data distribution was described by boxplot (minimum, first quartile, median, third quartile, and maximum).  $p < 0.05$  (Wilcoxon test) is considered as significant difference.

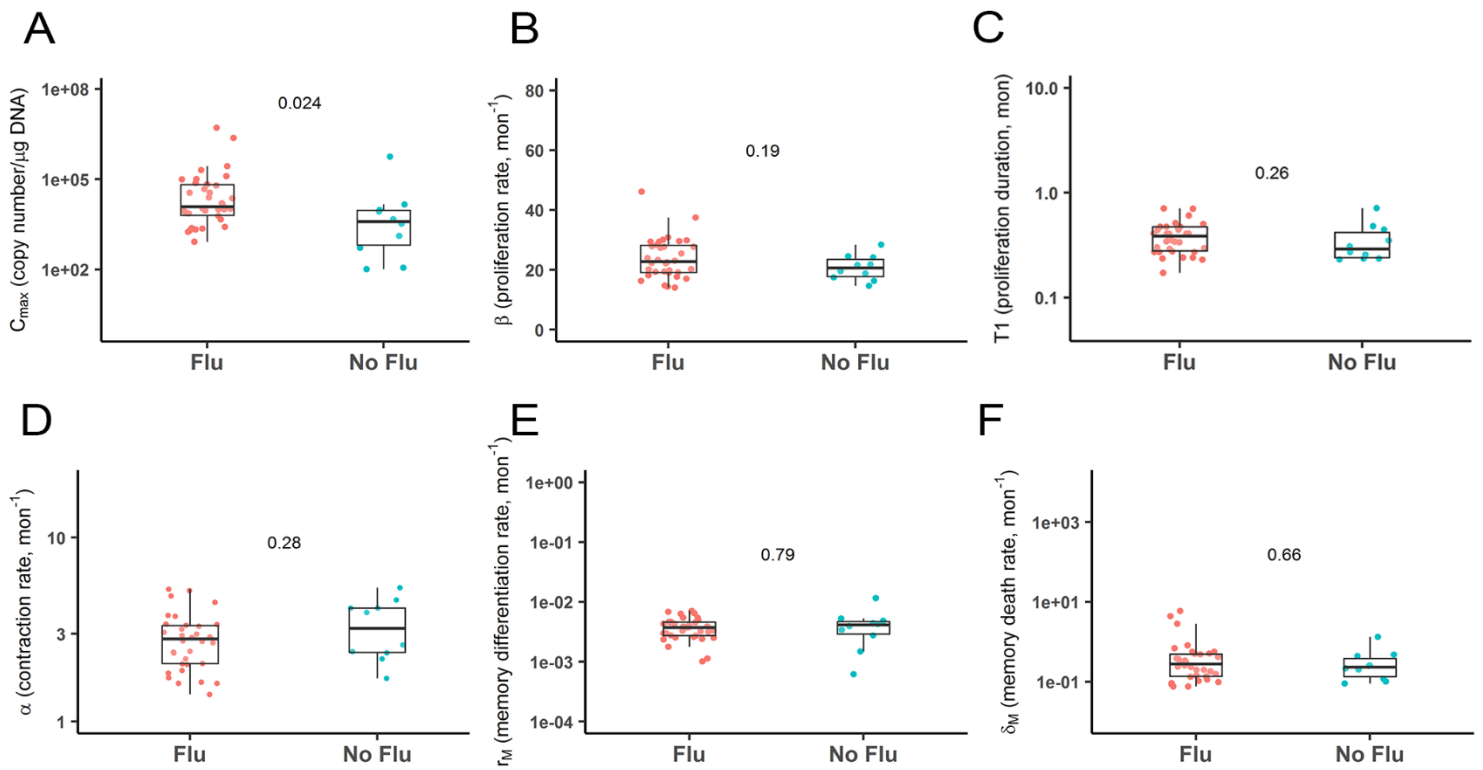



**Figure S15.** The correlations among model parameters. (A)  $C_{\max}$  showed positive correlation with  $\beta$  in overall, significance was observed in the trial of MM, DLBCL and NSCLC; (B)  $C_{\max}$  showed positive correlation with  $T_1$  in overall, significance was observed in the trial of MM and ALL (Adult); (C)  $\beta$  showed significant negative correlation with  $T_1$ , except the trial of MM and GBM; (D)  $\alpha$  showed mild negative correlation with  $\beta$  in overall, significance was observed in the trial of MM and ALL (Adult); (E) no obvious correlation between  $C_{\max}$  and  $\alpha$ ; (F)  $r_M$  showed negative correlation with  $\delta_M$  in overall, significance was observed in the trial of ALL (Pediatric), DLBCL, NSCLC and GBM; (G)  $r_M$  showed negative correlation with  $\alpha$  in most trials, significance was observed in the trial of ALL (Adult) and DLBCL; (H)  $r_M$  showed negative correlation with  $C_{\max}$  in overall, significance was observed in the trial of ALL (Pediatric) and MM.

**A**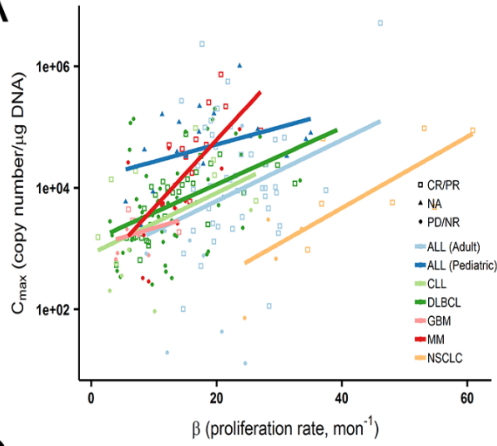**B**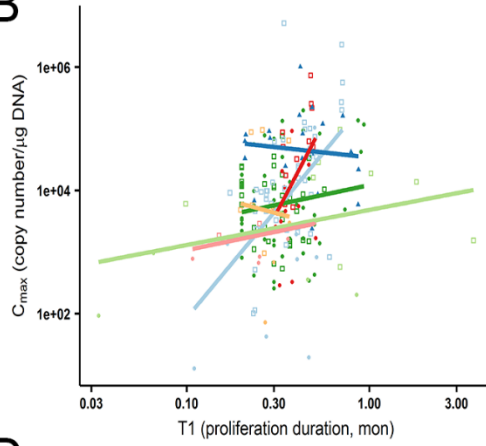**C**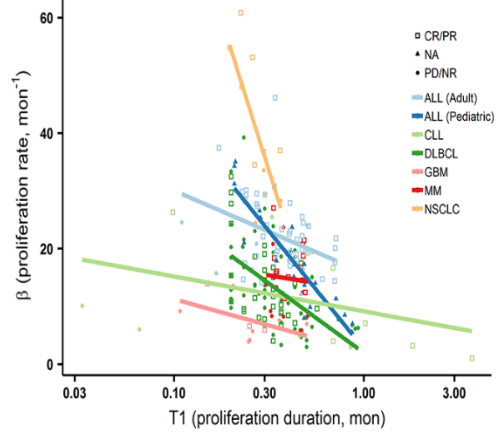**D**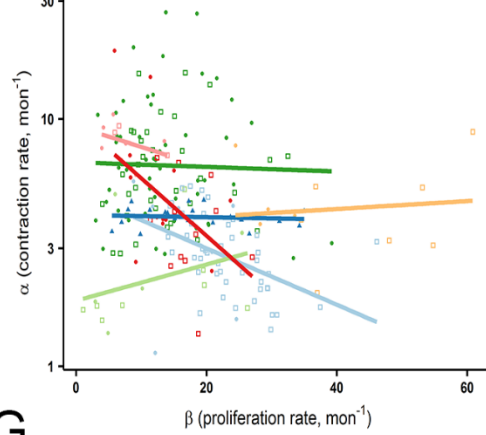**E**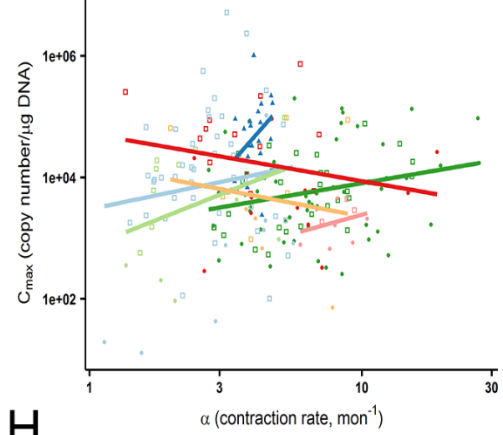**F**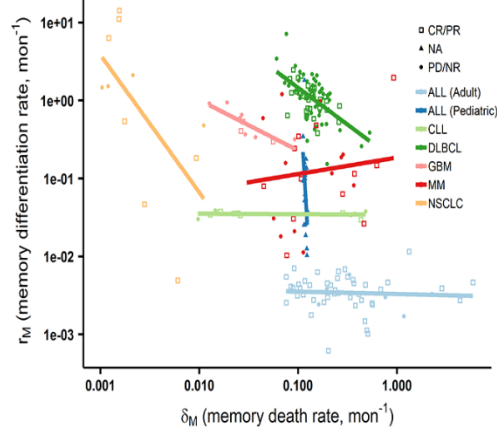**G**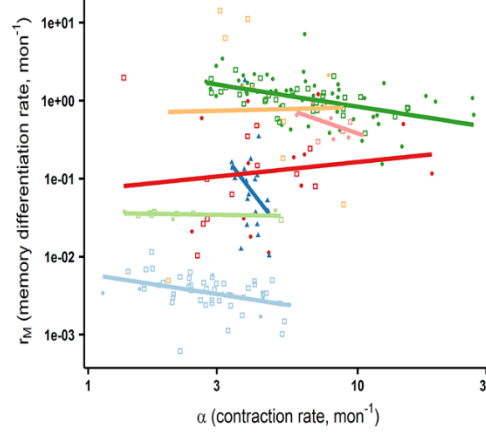**H**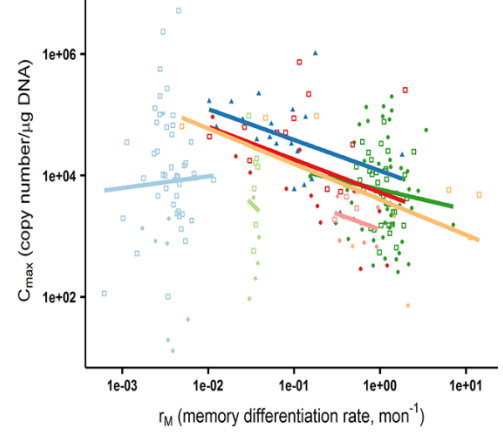

**Figure S16.** The simulated CAR-T kinetics of 1000 virtual patients for each trial. Simulations were performed based on population value of parameters with inter-individual variability. Solid red lines are the predicted median, the area between dashed red lines depict the 10<sup>th</sup>-90<sup>th</sup> percentile population prediction interval.

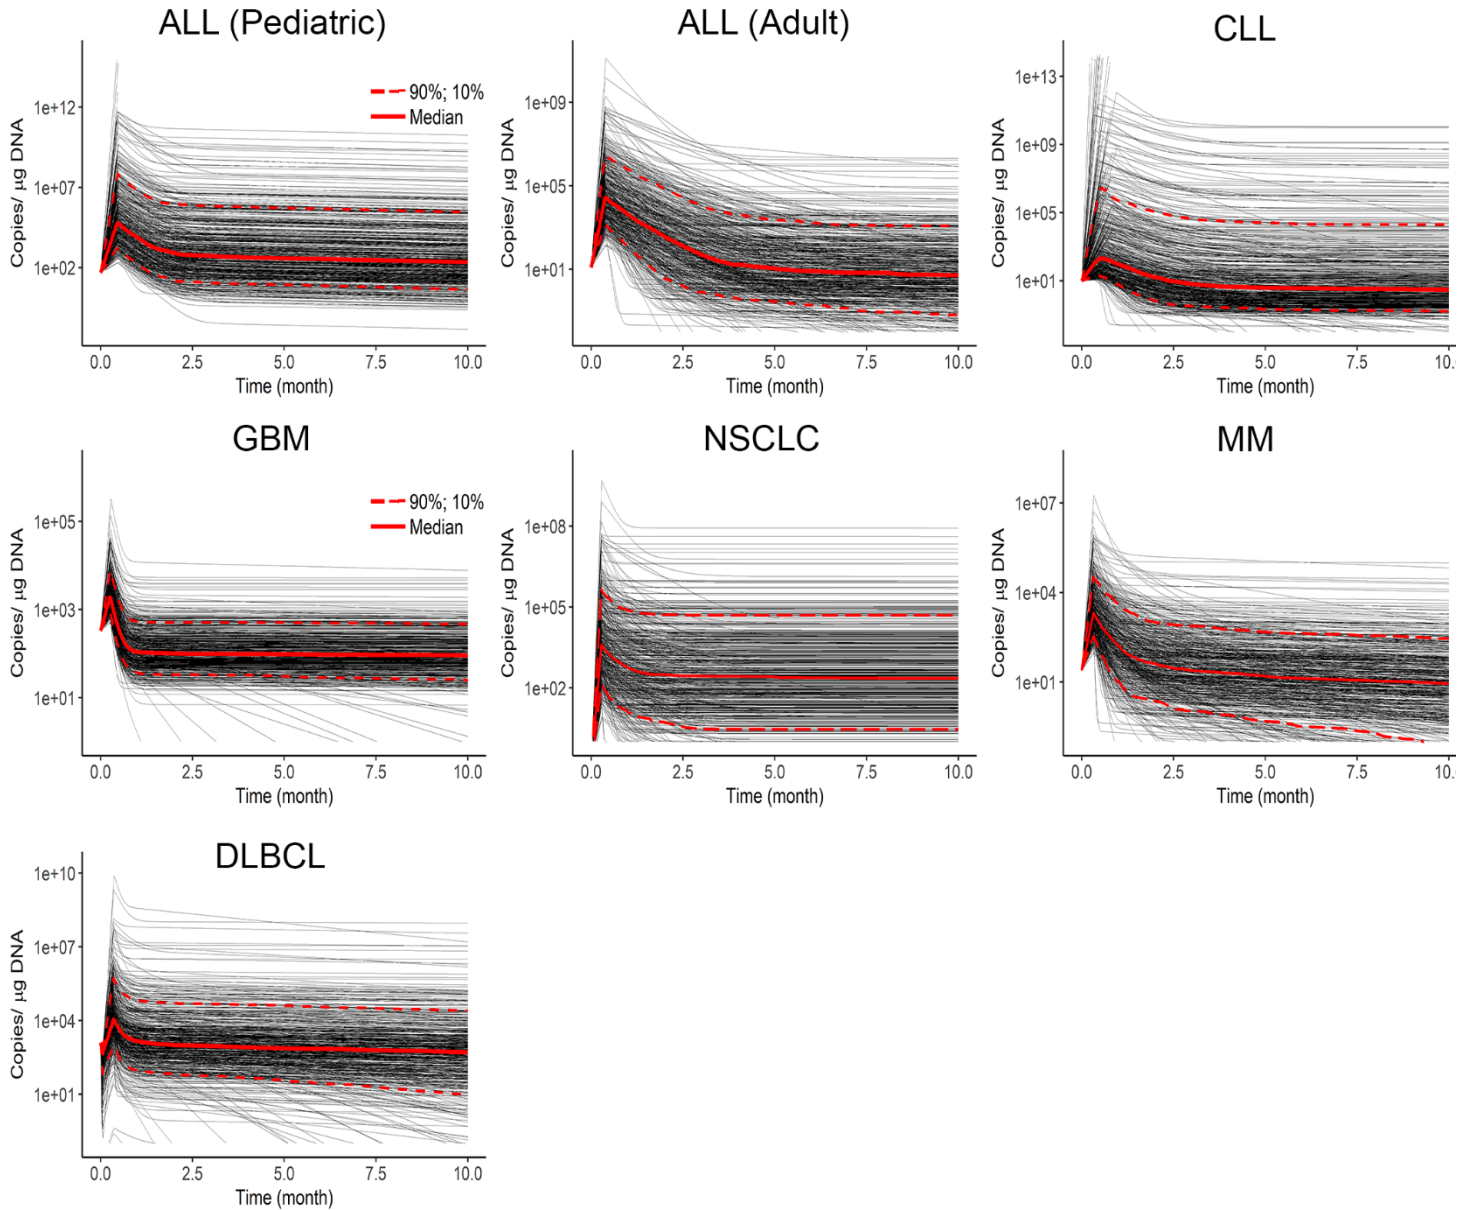

**Figure S17.** (A) The simulated kinetics for responders (CR/PR) and non-responders (PD/NR) in the trial of ALL (Adult) and MM. Simulations were performed based on population value of parameters. Green, red and blue lines stand for effector CAR-T, memory CAR-T and total CAR-T, respectively. (B) The simulated kinetics of 1000 virtual patients for the trial of ALL (Adult). The kinetics of total CAR-T, effector CAR-T and memory CAR-T were simulated respectively. Simulations were performed based on population value of parameters with inter-individual variability. Solid red lines are the predicted median, the area between dashed red lines depict the 10<sup>th</sup>–90<sup>th</sup> percentile population prediction interval.

**A****ALL (Adult)****MM****CR/PR**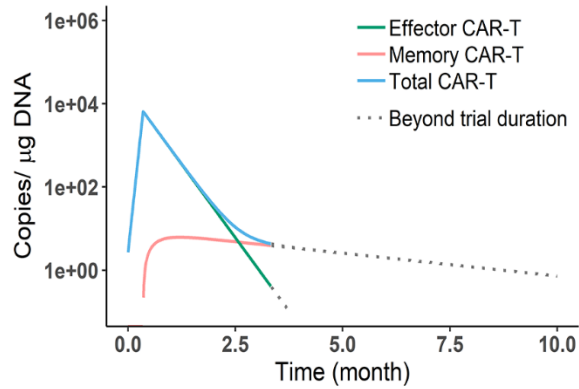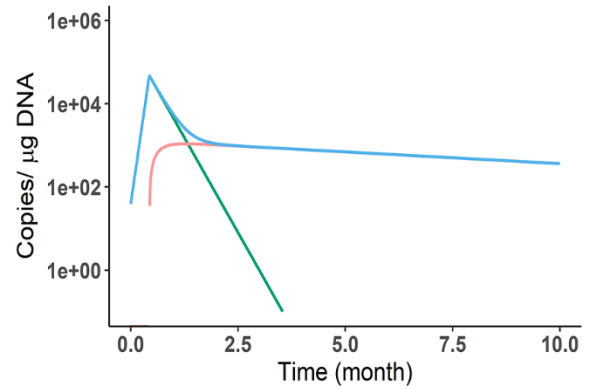**PD/NR**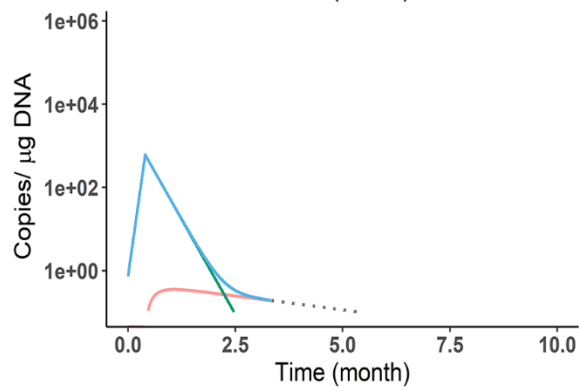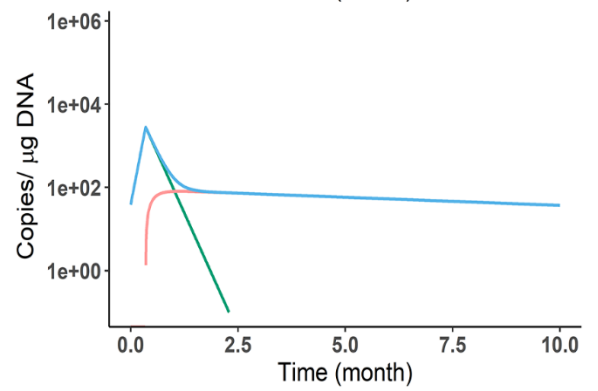**B**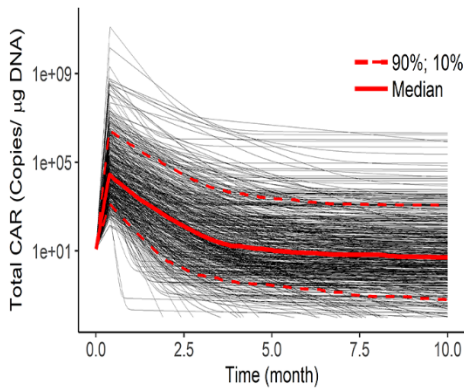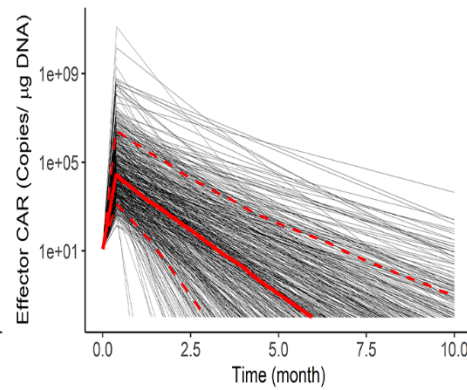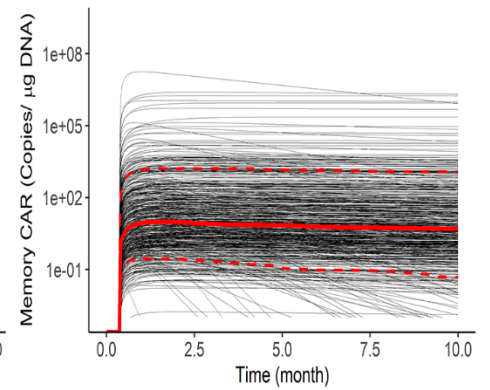

Supplement: Supplementary file [file 2020.05.09.20096586-1.pdf]
